# Supplementary material for: School-related risk factors for tungiasis among children aged 8 to 14 years in nine counties of Kenya: a cross-sectional survey
Source: Research Square preprint supplement (doi:10.21203/rs.3.rs-5070518/v1), 2025-11-10
Supplement: Supplementary file 1 [file 0e766cca1a1625cf6dd07d18.docx]

# Supporting information

School-related risk factors for tungiasis among children aged 8 to 14 years in nine counties of Kenya: a cross-sectional survey.

Lynne Elson1,2, Christopher Kamau3, Sammy Koech4, Christopher Muthama5, George Gachomba6, Erastus Sinoti7, Elwyn Chondo8, Eliud Mburu9, Miriam Wakio10, Jimmy Lore11, Marta Maia1,2, Ifedayo Adetifa1, 12, Benedict Orindi1, Phillip Bejon1,2, Ulrike Fillinger13

## S1 Distribution of pupil population by school variables

| **Variables** | **Categories** | **Number missing** | **Uninfected Pupils**  **N** | **Infected Pupils**  **N (%)** | **Total** | **P value** |
| --- | --- | --- | --- | --- | --- | --- |
| **All** |  |  | 21224 | 242 (1.1) | 21466 |  |
| County | Turkana | 0 | 2390 | 11 (0.5) | 2401 | <0.001 |
|  | Samburu |  | 2318 | 31 (1.3) | 2349 |  |
|  | Kericho |  | 2396 | 14 (0.6) | 2410 |  |
|  | Muranga |  | 2410 | 50 (2.0) | 2460 |  |
|  | Nakuru |  | 2400 | 40 (1.6) | 2440 |  |
|  | Kajiado |  | 2325 | 43 (1.8) | 2368 |  |
|  | Makueni |  | 2426 | 13 (0.5) | 2439 |  |
|  | Taita taveta |  | 2409 | 3 (0.1) | 2412 |  |
|  | Kilifi |  | 2150 | 37 (1.7) | 2187 |  |
| Pupil sex | Female | 0 | 10804 | 85 (0.8) | 10889 | <0.001 |
|  | Male |  | 10419 | 157 (1.5) | 10576 |  |
| School type | Day only | 0 | 17192 | 207 (1.2) | 17399 | 0.073 |
|  | Mixed |  | 4032 | 35 (0.9) | 4067 |  |
| School support | Private | 0 | 1851 | 3 (0.2) | 1854 | <0.001 |
|  | Public |  | 19373 | 239 (1.2) | 19612 |  |
| School location | Urban | 0 | 3528 | 26 (0.7) | 3554 | 0.014 |
|  | Rural |  | 17696 | 216 (1.2) | 17912 |  |
| Headteacher sex | Male | 0 | 15718 | 175 (1.1) | 15893 | 0.538 |
|  | female |  | 5506 | 67 (1.2) | 5573 |  |
| Total number of pupils enrolled | ≤ 400 | 0 | 12797 | 110 (0.9) | 12907 | <0.001 |
|  | >400 |  | 8427 | 132 (1.5) | 8559 |  |
| Condition of buildings | Good | 222 | 10261 | 81 (0.8) | 10342 | <0.001 |
|  | Not good |  | 10742 | 160 (1.5) | 10902 |  |
| Classrooms clean | No | 0 | 748 | 21 (2.7) | 769 | <0.001 |
|  | Yes |  | 20476 | 221 (1.1) | 20697 |  |
| Condition of toilets | Good | 444 | 14086 | 185 (1.3) | 14271 | 0.004 |
|  | Not good |  | 6694 | 57 (0.8) | 6751 |  |
| Access to clean water | Always | 221 | 12553 | 103 (0.8) | 12656 | <0.001 |
|  | Not always |  | 8461 | 128 (1.5) | 8589 |  |
| Handwashing stations in school yard | No | 0 | 3225 | 32 (1.0) | 3257 | 0.395 |
|  | Yes |  | 17999 | 210 (1.2) | 18209 |  |
| Hygiene signs in school yard | No | 0 | 8150 | 116 (1.4) | 8266 | 0.002 |
|  | Yes |  | 13074 | 126 (1.0) | 13200 |  |
| Cats seen on compound | No | 110 | 19484 | 234 (1.2) | 19718 | 0.001 |
|  | Yes |  | 1632 | 5 (0.3) | 1637 |  |
| Cows seen on compound | No | 110 | 15885 | 169 (1.1) | 16054 | 0.108 |
|  | Yes |  | 5231 | 70 (1.3) | 5301 |  |
| Wild animals seen on compound | No | 221 | 19707 | 212 (1.1) | 19919 | 0.001 |
|  | Yes |  | 1299 | 27 (2.0) | 1326 |  |
| Income generating project | No | 0 | 17237 | 220 (1.3) | 17457 | <0.001 |
|  | Yes |  | 3987 | 22 (0.6) | 4009 |  |
| Check pupils have washed | No | 108 | 604 | 2 (0.1) | 606 | 0.058 |
|  | Yes |  | 20512 | 240 (1.2) | 20752 |  |
| Action if not washed | Assist at school | 643 | 7194 | 65 (0.9) | 7259 | 0.011 |
|  | Not assist at school |  | 13389 | 175 (1.3) | 13564 |  |
| Check pupils wearing shoes | No | 0 | 4750 | 39 (0.8) | 4789 | 0.020 |
|  | Yes |  | 16474 | 203 (1.2) | 16677 |  |
| Action if not wearing shoes | Other | 669 | 18157 | 192 (1.1) | 18349 | 0.001 |
|  | Send home |  | 2403 | 45 (1.8) | 2448 |  |
| Notice pupil ill-health | No | 0 | 770 | 4 (0.5) | 774 | 0.101 |
|  | Yes |  | 20454 | 238 (1.2) | 20692 |  |
| Had a deworming event | No | 0 | 3285 | 30 (0.9) | 3315 | 0.187 |
|  | Yes |  | 17939 | 212 (1.2) | 18151 |  |
| Last deworming event date | 1-3 months | 3428 | 9024 | 133 (1.5) | 9157 | <0.001 |
|  | >3 months |  | 8802 | 79 (0.9) | 8881 |  |
| Jigger treatment event | No | 12687 | 7304 | 147 (2.0) | 7451 | 0.225 |
|  | Yes |  | 1295 | 33 (2.5) | 1328 |  |
| Hygiene promotion | No | 78 | 1841 | 27 (1.5) | 1868 | 0.179 |
|  | Yes |  | 19305 | 215 (1.1) | 19520 |  |
| Jigger prevention program | No | 113 | 19104 | 192 (1.0) | 19296 | <0.001 |
|  | Yes |  | 2007 | 50 (2.4) | 2057 |  |
|  |  |  |  |  |  |  |
| **Mean (sd)** |  |  |  |  |  |  |
| Pupil age |  | 0 | 10.8 (2.0) | 10.1 (1.8) | 10.8 (2.0) | <0.001 |
| Headteacher age |  | 73 | 48.7 (7.7) | 50.3 (6.7) | 48.7 (7.9) | 0.001 |
| Headteacher duration in school |  | 113 | 4.2 (4.0) | 4.4 (4.9) | 4.2 (4.1) | 0.505 |
| Ratio of boys: girls |  | 110 | 1.08 (0.23) | 1.13 (0.27) | 1.08 (0.23) | 0.001 |
| Ratio of pupils: teachers |  | 0 | 37.4 (20.5) | 44.4 (24.6) | 37.3 (20.6) | <0.001 |
| Ratio of boys: male toilets |  | 0 | 40.6 (35.3) | 40 (31.8) | 40.6 (35.3) | 0.776 |
| Ratio of girls: female toilets |  | 87 | 34.8 (30.1) | 32.4 (28.9) | 34.8 (30.1) | 0.205 |

## S2 Sensitivity analysis for the school model

Measures for fit of final model using two different variables for building condition, excluding the variable completely and for the full model including building condition but excluding school cleanliness.

| **Variable** |  | **Number of observations in model** | **AICa** | **Wald chi2** | **Log-likelihood** | **Likelihood ratio test** |
| --- | --- | --- | --- | --- | --- | --- |
| Building condition | 2-level (good/not good) | 21021 | 2157 | 70.94 | -1069 | chi2(1) = 1.39  pb = 0.239 |
|  | 3-level (good/average/poor) | 21021 | 2158 | 72.39 | -1068 |
| Excluding building condition |  | 21243 | 2172 | 68.94 | -1077 |  |
| Excluding school cleanliness |  | 21021 | 2159 | 67.59 | -1070 | chi2(1) = 3.23  pc = 0.072 |

a  Akaike information criteria; b p value for lr-test comparing models with the two different building condition variables; c  p value for lr-test comparing models with and without the school cleanliness variable.

##

## S3 Distribution of pupil population by classroom variables

| **Variables** | **Categories** | **Number missing** | **Uninfected Pupils**  **N** | **Infected Pupils**  **N (%)** | **Total** | **P-value** |
| --- | --- | --- | --- | --- | --- | --- |
| All |  |  | 5050 | 56 (1.1) | 5106 |  |
| County | Turkana | 0 | 693 | 3 (0.4) | 696 | <0.001 |
|  | Samburu |  | 460 | 6 (1.3) | 466 |  |
|  | Kericho |  | 804 | 5 (0.6) | 809 |  |
|  | Muranga |  | 665 | 20 (2.9) | 685 |  |
|  | Nakuru |  | 879 | 6 (0.7) | 885 |  |
|  | Kajiado |  | 632 | 4 (0.6) | 636 |  |
|  | Makueni |  | 652 | 5 (0.8) | 657 |  |
|  | Taita taveta |  | 112 | 0 | 112 |  |
|  | Kilifi |  | 153 | 7 (4.4) | 160 |  |
| Pupil sex | Female |  | 2564 | 18 (0.7) | 2582 | 0.006 |
|  | Male |  | 2485 | 38 (1.5) | 2523 |  |
| Roof materials | Iron sheet | 39 | 4980 | 56 (1.1) | 5036 | 0.840 |
|  | Natural |  | 14 | 0 | 14 |  |
|  | other |  | 17 | 0 | 17 |  |
| Wall materials | Stone/brick | 53 | 4827 | 52 (1.1) | 4879 | 0.171 |
|  | other |  | 174 | 0 | 174 |  |
| Floor materials | Concrete | 16 | 4994 | 56 | 5050 | 0.503 |
|  | other |  | 40 | 0 | 40 |  |
| Condition of concrete floors | Good | 230 | 2195 | 17 | 2212 | 0.248 |
|  | Slightly or very broken |  | 2632 | 29 | 2661 |  |
| Amount of loose dust/soil | None or a little | 4 | 4292 | 30 | 4322 | <0.001 |
|  | A lot |  | 755 | 25 | 780 |  |
| Classroom cleanliness | Tidy & clean | 0 | 564 | 21 | 585 | <0.001 |
|  | Not tidy & clean |  | 4487 | 34 | 4521 |  |
|  |  |  |  |  |  |  |
| **Mean (sd)** |  |  |  |  |  |  |
| Pupil age |  | 0 | 10.8 (1.9) | 10.1 (1.6) | 10.8 (1.9) | 0.004 |
| No. pupils enrolled in class |  | 35 | 37.9 (17.5) | 43.0 (21.4) | 38.0 (17.5) | 0.032 |
| No. pupils absent on the day |  | 0 | 2.0 (3.2) | 3.7 (4.7) | 2.0 (3.2) | <0.001 |
| Pupil density (pupils / m2) |  | 52 | 0.7 (0.5) | 0.6 (0.3) | 0.7(0.5) | 0.037 |

## S4 Collinearity diagnostics for classroom variables

**Chi2 tests**

| Number of pupils | **Amount of loose dust soil** | | |  |
| --- | --- | --- | --- | --- |
| **Concrete floor condition** | None | A little | A lot | Total |
| Good | 959 | 1,059 | 194 | 2,212 |
| Slightly cracked | 214 | 1,725 | 183 | 2,122 |
| Very broken | 31 | 191 | 317 | 539 |
| Total | 1,204 | 2,975 | 694 | 4,873 |

**Pearson chi2(4) = 1.7e+03 P<0.001**

| Number of pupils | **Classroom cleanliness** | | |  |
| --- | --- | --- | --- | --- |
| **Concrete floor condition** | Tidy & clean | Slightly tidy & clean | Very untidy & dirty | Total |
| Good | 1,190 | 918 | 104 | 2,212 |
| Slightly cracked | 325 | 1,586 | 211 | 2,122 |
| Very broken | 28 | 310 | 201 | 539 |
| Total | 1,543 | 2,814 | 516 | 4,873 |

**Pearson chi2(4) = 1.3e+03 P< 0.001**

| Number of pupils | **Amount of loose dust soil** | | |  |
| --- | --- | --- | --- | --- |
| **Classroom cleanliness** | none | A little | A lot | Total |
| Tidy & clean | 842 | 785 | 0 | 1,627 |
| Slightly tidy & clean | 374 | 2,150 | 366 | 2,890 |
| Very untidy & dirty | 20 | 151 | 414 | 585 |
| Total | 1,236 | 3,086 | 780 | 5,102 |

**Pearson chi2(4) = 2.5e+03 P< 0.001**

**Variance inflation factor:**

| **Variable** | **VIF** |
| --- | --- |
| Concrete floor condition | 1.04 |
| Amount of loose dust soil | 1.37 |
| Classroom cleanliness | 1.39 |
| Mean VIF | 1.26 |

## S5 Sensitivity and specificity of (head)teacher awareness of tungiasis cases

|  | Teachers | 95% CI | Headteachers | 95% CI |
| --- | --- | --- | --- | --- |
| Prevalence | 16.2% | 10.1%−24.2% | 39.0% | 32.1%−46.2% |
|  |  |  |  |  |
| Sensitivity | 73.7% | 48.8%−90.9% | 44.7% | 33.3%−56.6% |
| Specificity | 95.9% | 89.9%−98.9% | 92.4% | 86.1%−96.5% |
| Positive predictive value | 77.8% | 52.4%−93.6% | 79.1% | 64.0%−90.0% |
| Negative predictive value | 94.9% | 88.6%−98.3% | 72.4% | 64.5%−79.3% |
